# Supplementary material
Source: PubMed Central journal article supplement (PMC4105257)
Supplement: supp_WNL.0000000000000483_Figure_e-1.pdf [file supp_WNL.0000000000000483_Figure_e-1.pdf]

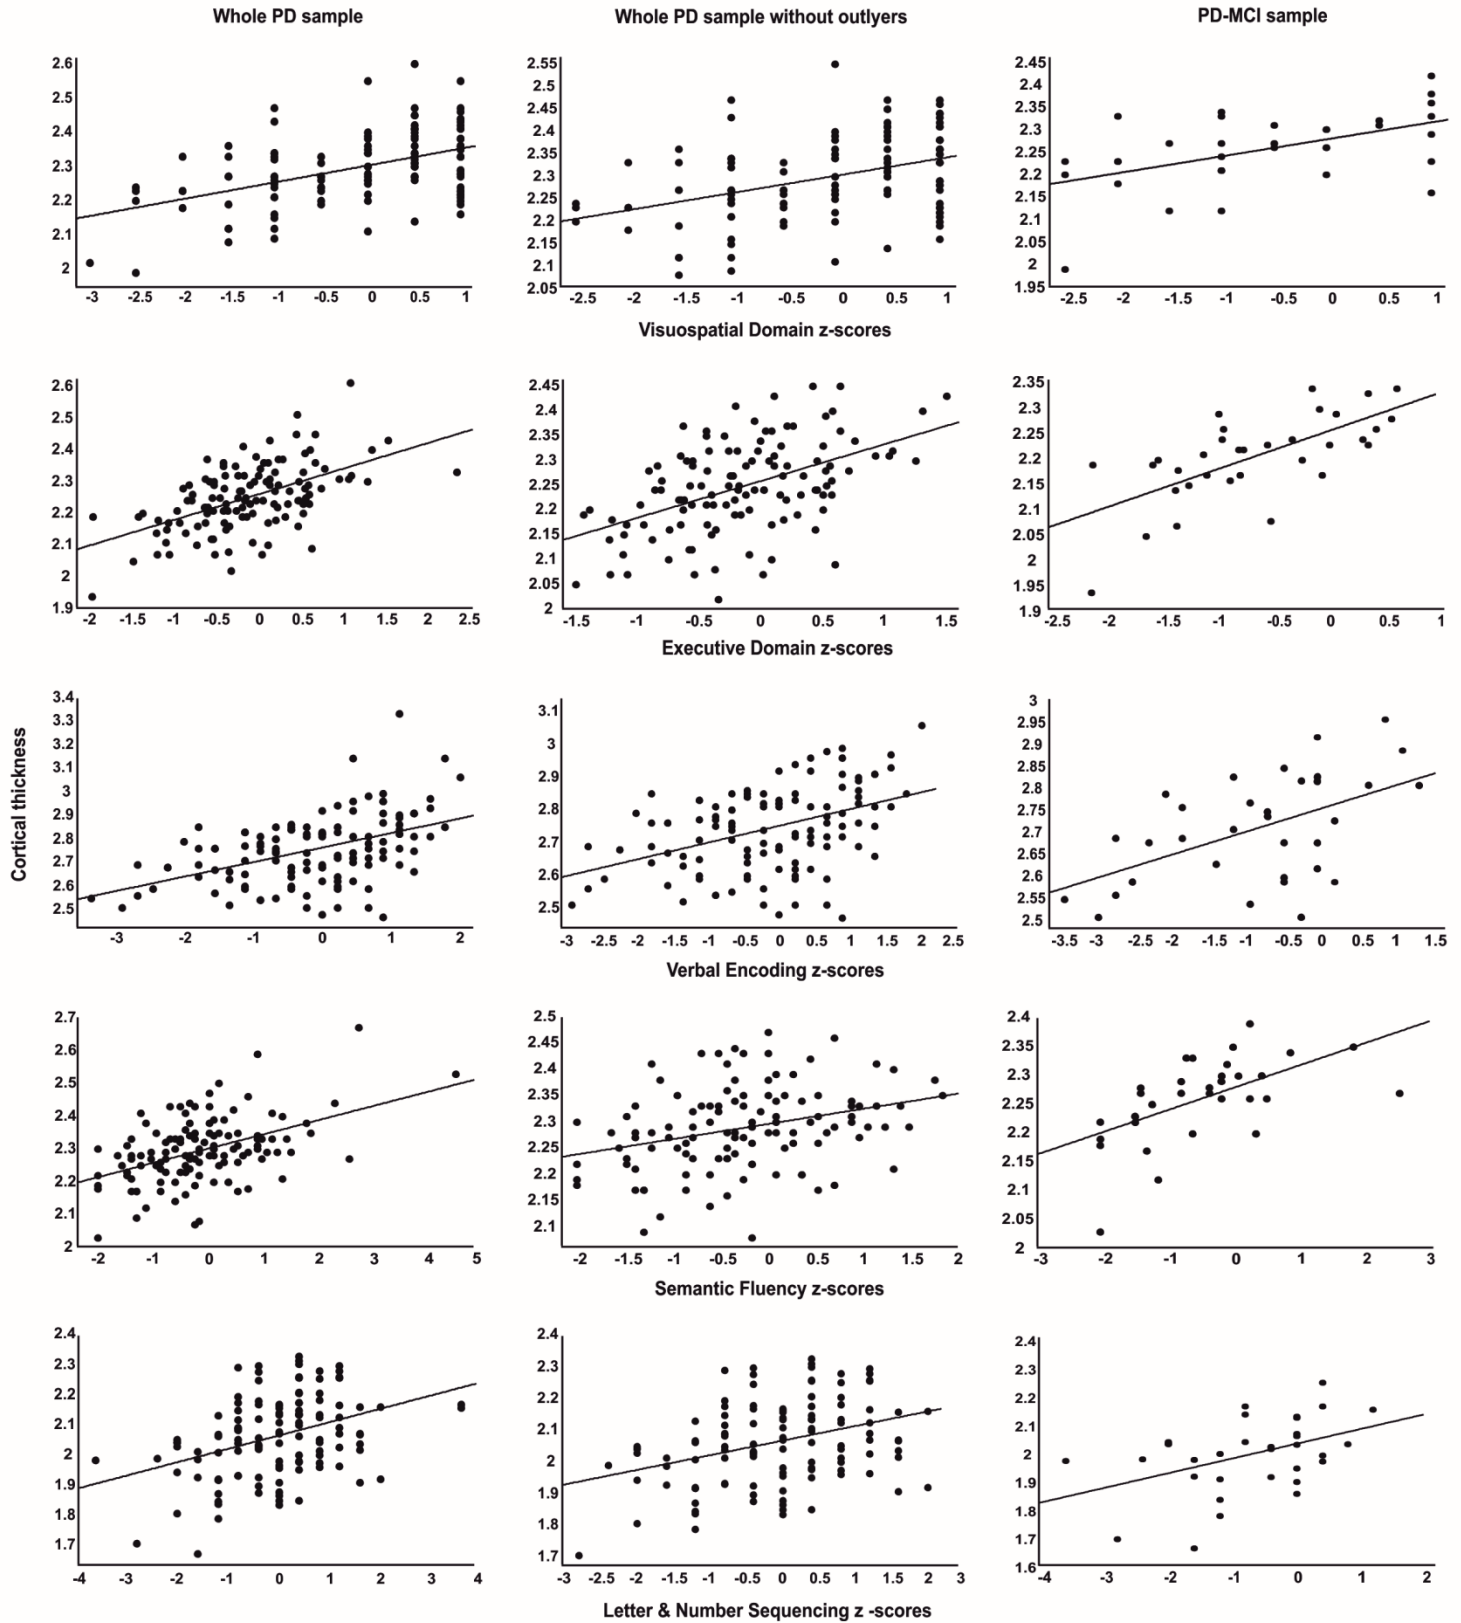

**Supplemental Figure e-1.**

Title: Plots of significant correlations between cortical thickness and cognition in PD patients. Left: Whole patient sample; Middle: Whole patient sample without outliers; Right: In PD-MCI patients only.

Legend: Analyses were performed using Spearman correlation coefficients. X axis: Z-scores of cognitive domains and tests. Y axis: cortical thickness of regions that showed a significant correlation with each cognitive domain and test.
